# Supplementary material for: Using a cyclocarbon additive as a cyclone separator to achieve fast lithiation and delithiation without dendrite growth in lithium-ion batteries
Source: Royal Society of Chemistry journal article supplement (doi:10.1039/d3nr04649d), 2023-11-13
Supplement: d3nr04649d1.pdf [file d3nr04649d1.pdf]

**Supplementary Information**

for

**Using Cyclocarbon Additive as Cyclone Separator to Achieve Fast  
Lithiation and Delithiation Without Dendrite Growth  
in Lithium-ion Batteries**

*Jiacheng Gong, Jiabao Zhu, Xiao He\* and Jinrong Yang\**

## Table of Contents

### Section S1. Lithium-ion batteries

|                                                                                     |    |
|-------------------------------------------------------------------------------------|----|
| <b>Note S1.</b> Cell voltage.....                                                   | 3  |
| <b>Note S2.</b> Strain energy and Julg structure index.....                         | 4  |
| <b>Note S3.</b> Periodical optimization.....                                        | 5  |
| <b>Figure S1.</b> Adsorption energy and cohesion energy of Li atoms.....            | 6  |
| <b>Figure S2.</b> Static analysis of cyclocarbon.....                               | 7  |
| <b>Figure S3.</b> Geometries of Li <sup>+</sup> /Li cyclocarbon complexes.....      | 8  |
| <b>Figure S4.</b> Interaction energies of Li <sup>+</sup> /Li complexes.....        | 9  |
| <b>Figure S5.</b> Interaction maps of Li <sup>+</sup> /Li complexes.....            | 10 |
| <b>Figure S6.</b> Orbital analysis of cyclocarbon.....                              | 11 |
| <b>Figure S7.</b> Charge analysis of Li <sup>+</sup> /Li complexes.....             | 12 |
| <b>Figure S8.</b> Dynamical courses of Li <sup>+</sup> .....                        | 14 |
| <b>Figure S9.</b> Dynamical courses of Li.....                                      | 15 |
| <b>Figure S10.</b> Dynamical courses of Li cluster.....                             | 16 |
| <b>Figure S11.</b> Periodical geometries of cyclocarbon graphene complexes.....     | 17 |
| <b>Table S1.</b> Referenced adsorption energies of Li <sup>+</sup> /Li.....         | 18 |
| <b>Table S2.</b> Adsorption energies of inside and outside Li <sup>+</sup> /Li..... | 19 |
| <b>Table S3.</b> Cyclocarbon deformation in Li <sup>+</sup> /Li complexes.....      | 20 |
| <b>Table S4.</b> Compatibility of cyclocarbon.....                                  | 21 |

### Section S2. Sodium-ion batteries and potassium-ion batteries

|                                                                                                        |    |
|--------------------------------------------------------------------------------------------------------|----|
| <b>Figure S12.</b> Geometries of Na <sup>+</sup> /Na and K <sup>+</sup> /K complexes.....              | 22 |
| <b>Figure S13.</b> Host-guest interactions of Na <sup>+</sup> /Na and K <sup>+</sup> /K complexes..... | 23 |
| <b>Figure S14.</b> Interaction maps of Na <sup>+</sup> /Na and K <sup>+</sup> /K complexes.....        | 24 |
| <b>Figure S15.</b> Host-guest interactions of double atoms.....                                        | 25 |
| <b>Figure S16.</b> Dynamical courses of Na <sup>+</sup> /K <sup>+</sup> .....                          | 26 |
| <b>Figure S17.</b> Dynamical courses of Na/K.....                                                      | 27 |
| <b>Table S5.</b> Referenced adsorption energies of Na <sup>+</sup> /Na.....                            | 28 |
| <b>Table S6.</b> Referenced adsorption energies of K <sup>+</sup> /K.....                              | 29 |
| <b>Table S7.</b> Adsorption energies of inside and outside Na <sup>+</sup> /Na.....                    | 30 |
| <b>Table S8.</b> Adsorption energies of inside and outside K <sup>+</sup> /K.....                      | 31 |
| <b>Table S9.</b> Adsorption energies and cell voltages of Na <sup>+</sup> /Na.....                     | 32 |
| <b>Table S10.</b> Adsorption energies and cell voltages of K <sup>+</sup> /K.....                      | 33 |
| <b>Table S11.</b> Cyclocarbon deformation in Na <sup>+</sup> /Na complexes.....                        | 34 |
| <b>Table S12.</b> Cyclocarbon deformation in K <sup>+</sup> /K complexes.....                          | 35 |

## Section 1. Lithium-ion batteries

### Note S1. The calculated details of adsorption energies and cell voltages.

The overall reaction of  $\text{Li}^+/\text{Li}@C$  (C refers to carbon-based materials) is simplified and expressed by the following expression:

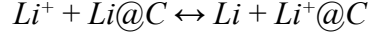

The cell voltage can be determined by the Nernst equation<sup>1, 2</sup>:

$$V_{\text{cell}} = -\Delta G_{\text{cell}} / zF$$

where  $z$  is +1 a.u., on behalf of the charge of the  $\text{Li}^+$ ,  $F$  is the Faraday constant, generally regarded as 96500 C/mol, and  $\Delta G_{\text{cell}}$  is Gibbs free energy.  $\Delta G_{\text{cell}}$  can be calculated by

$$\Delta G_{\text{cell}} = \Delta E_{\text{react}} + P\Delta V_{\text{react}} - T\Delta S_{\text{react}}$$

where  $\Delta E_{\text{react}}$  is the reaction energy,  $P$  is the intensity of pressure,  $\Delta V_{\text{react}}$  is the volume change,  $T$  is the temperature, and  $\Delta S_{\text{react}}$  is the entropy change. Since the contributions of entropy ( $T\Delta S_{\text{react}}$ ) and volume ( $P\Delta V_{\text{react}}$ ) effects to the cell voltage are extremely small<sup>3</sup> for condensed matter reaction at 0 K,  $\Delta G_{\text{cell}}$  of the chemical reaction of  $\text{Li}^+$  cation cell can be approximated as the internal energy, calculated by

$$\Delta G_{\text{cell}} = \Delta E_{\text{react}} = \Delta E_{\text{tot}} = E_{\text{Li}} + E_{\text{Li}^+@C} - E_{\text{Li}@C} - E_{\text{Li}^+}$$

The internal energy  $\Delta E_{\text{tot}}$  can be seen as the adsorption energy of  $\text{Li}^+$  ions minus the adsorption energy of Li atoms ( $\Delta E_{\text{tot}} = E_{\text{adsLi}^+} - E_{\text{adsLi}}$ ), which means that the  $V_{\text{cell}}$  is at rest with both  $\text{Li}^+$  ion and Li atom adsorptions. The  $E_{\text{ads}}$  and  $V_{\text{cell}}$  of  $\text{Na}^+/\text{Na}@C$  and  $\text{K}^+/\text{K}@C$  can also be calculated in the same way as  $\text{Li}^+/\text{Li}@C$ .

**Note S2. The calculated details of strain energies and Julg structure index.**

The strain energy can be calculated by

$$E_{\text{Li}^+/\text{Li}} = E_{\text{aft}} - E_{\text{bef}}$$

where  $E_{\text{aft}}$  and  $E_{\text{bef}}$  are the energy of  $\text{C}_{14}$  after interacting with  $\text{Li}^+/\text{Li}$  and before adsorption.

The Julg structure index is defined as<sup>4</sup>

$$A_{\text{jLi}^+/\text{Li}} = 1 - (225/n) \sum (1 - R_r/R)^2$$

where  $n$  is the number of carbon atoms, and it is 14 for  $\text{C}_{14}$ .  $R_r$  is the length of each C-C bond on the ring, and  $R$  is the average C-C bond length. When every  $R_r$  is equal to  $R$ , the  $A_{\text{jLi}^+/\text{Li}}$  is going to be zero meaning absolutely aromatic.

### **Note S3. The optimization details of periodical geometries.**

We use the VASP code<sup>5-8</sup> to optimize the periodical geometries of  $C_{14}@C_{14}$ ,  $C_{14}@Graphene$ ,  $Li@C_{14}$ ,  $Li@Graphene$  and  $Li@C_{14}-Graphene$ . The generalized gradient approximation (GGA)<sup>9</sup> with the Perdew-Burke-Ernzerhof (PBE)<sup>10</sup> functional is employed to describe the electron exchange-correlation interactions. DFT-D3 method of Grimme with zero-damping function<sup>11</sup> is used to describe weak interaction of adsorption, and the cut-off energy is set to 400 eV for all calculations. The integration of the Brillouin zone is conducted using a  $3 \times 3 \times 1$  k-points mesh. The vacuum space of 20 Å is set in the direction normal to the sheets to avoid interactions between periodic images. For geometrical optimization, the graphene base is fixed, but  $C_{14}$  and Li are relaxed in every direction. Convergence in energy and force are set at  $1 \times 10^{-4}$  eV/atom and 0.02 eV/Å, respectively.

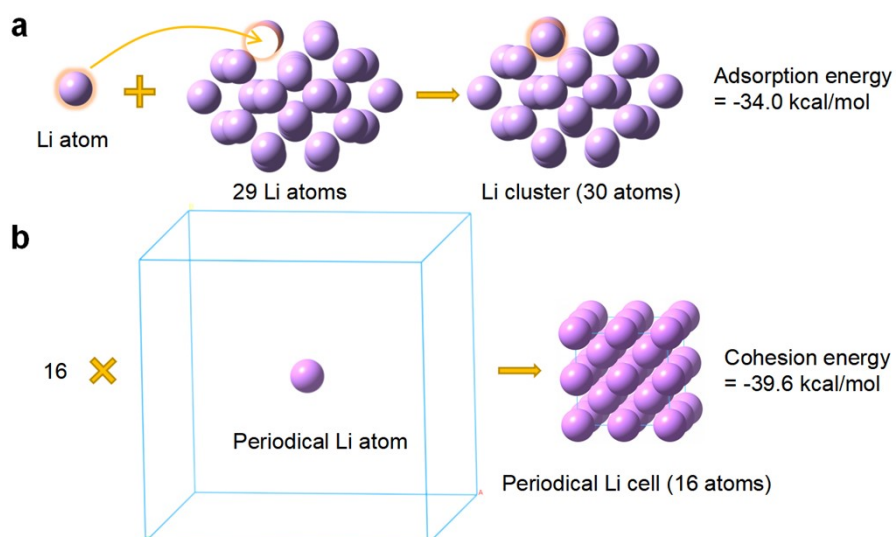

**Figure S1. The adsorption energy and cohesion energy of Li atoms.**

(a), The adsorption energy of the Li atom interacting with other Li atoms in a cluster consisting of 30 Li atoms. The geometries are optimized by the density functional theory, at the level of  $\omega$ B97XD/6-311G(d). (b), The cohesion energy of a Li atom. The periodical geometries of the Li cell and sole Li atom are optimized by VASP, using the DFT-D3 corrected GGA-PBE method. The cohesion energy is required to assemble an amount of a substance from the point where intermolecular forces dissolve to the point where a complete complex is formed, as a measure of how tightly the molecules of a substance are bound together. The cohesion of a Li atom in a periodical cell (-34.0 kcal/mol), close to the adsorption of a Li atom in a cluster (-43.5 kcal/mol), is stronger than the adsorption between a Li atom and graphene (-20.5 kcal/mol) or carbon nanotube (-36.4 kcal/mol) in Fig. 1a.

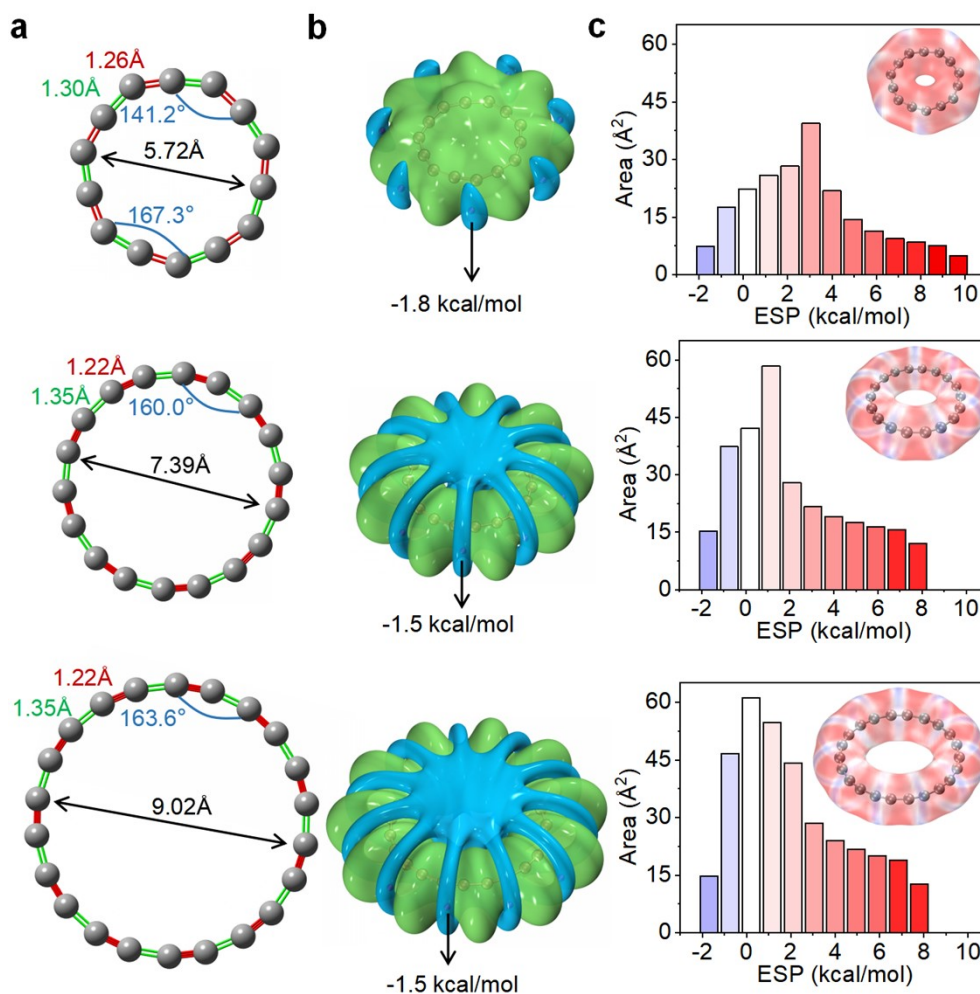

**Figure S2. Static analysis of C<sub>14</sub>, C<sub>18</sub> and C<sub>22</sub>.**

(a), Geometries of C<sub>14</sub> (Top), C<sub>18</sub> (Middle) and C<sub>22</sub> (Bottom). The gray spheres are carbon atoms. The red bonds represent the shorter C-C bonds, and their average length is 1.26 Å for C<sub>14</sub> and 1.22 Å for C<sub>18</sub> and C<sub>22</sub>. The green bonds denote the longer C-C bonds, and their average length is 1.30 Å for C<sub>14</sub> and 1.35 Å for C<sub>18</sub> and C<sub>22</sub>. The blue arcs are bond angles between adjacent short and long C-C bonds. For C<sub>14</sub>, its alternative angles are 141.2° and 167.3°, respectively. And there is no evident difference of alternation among angles in C<sub>18</sub> and C<sub>22</sub>, which are 160.0° and 163.6°. The black double-headed arrows represent the diameter of C<sub>14</sub>, C<sub>18</sub> and C<sub>22</sub> rings, which are 5.72 Å, 7.39 Å and 9.02 Å, respectively. All geometries are optimized by Gaussian at the level of ωB97XD/6-311+G(2d). (b), Isosurface maps of the electrostatic potential (ESP) of C<sub>14</sub> (Top), C<sub>18</sub> (Middle) and C<sub>22</sub> (Bottom). Positive isosurfaces are in green, and negative ones are in blue. To ensure the integrity of isosurfaces, both of their isovalues are set as 0.0014 a.u., 0.0080 a.u. and 0.0070 a.u. for C<sub>14</sub>, C<sub>18</sub> and C<sub>22</sub> rings, respectively. The purple spheres inside the blue isosurface denote the minimum point of negative ESP, which is -1.8 kcal/mol in C<sub>14</sub> and -1.5 kcal/mol in C<sub>18</sub> and C<sub>22</sub>. (c), Area distribution of different ESP intervals on the vdW surface of C<sub>14</sub> (Top), C<sub>18</sub> (Middle) and C<sub>22</sub> (Bottom). All isovalues of vdW isosurface are 0.001 a.u.. The brighter the red, the larger the positive value of ESP and the more solid the blue, the smaller the negative value of ESP. In C<sub>14</sub>, ESP on the vdW surface is distributed from -1.6 kcal/mol to 9.8 kcal/mol. That value is between -1.5 kcal/mol to 8.0 kcal/mol on the surface of C<sub>18</sub> and between -1.4 kcal/mol to 8.0 kcal/mol on that of C<sub>22</sub>.

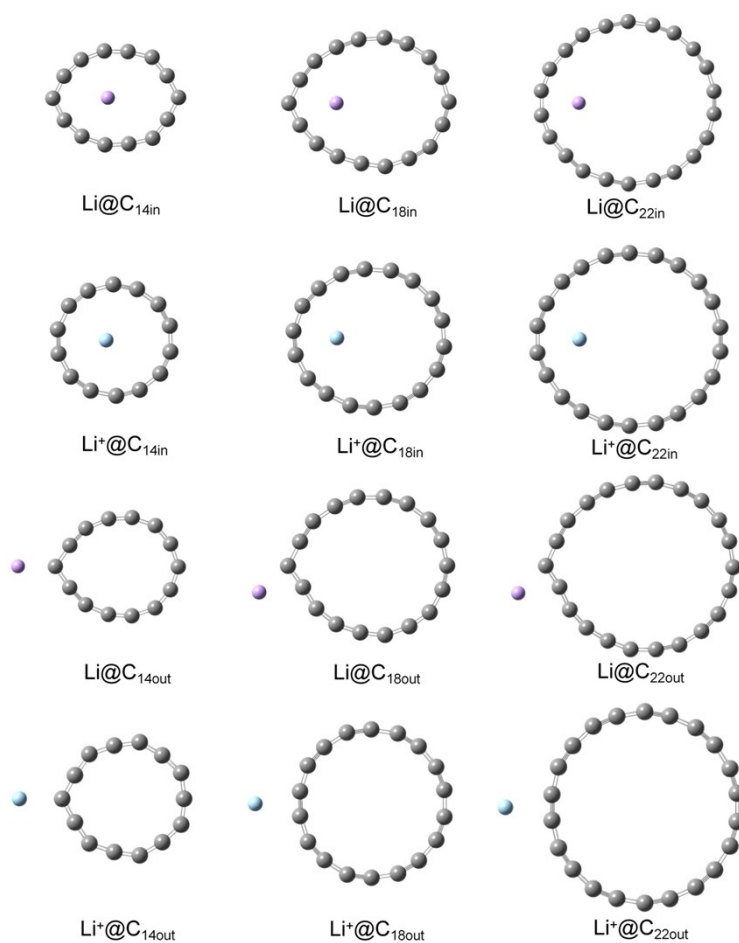

**Figure S3. Top view of geometries of Li<sup>+</sup>/Li combined inside and outside C<sub>14</sub>, C<sub>18</sub> and C<sub>22</sub>.**

All geometries are optimized by Gaussian at the level of  $\omega\text{B97XD}/6\text{-}311+\text{G}(2\text{d})$ . The distortion of cyclocarbons that interacting with Li is larger than that with Li<sup>+</sup> (refer to Table S3).



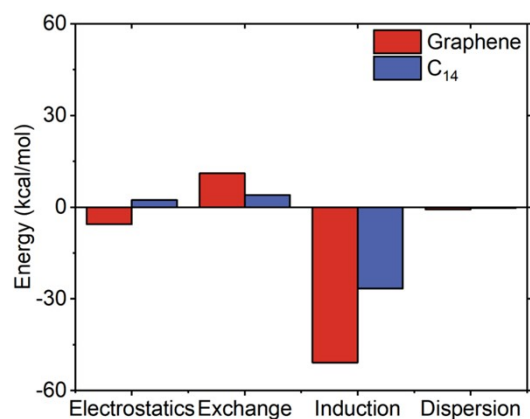

**Figure S4. Components of the interaction energy between Li<sup>+</sup> ion and C<sub>14</sub> or Graphene.**

The symmetry-adapted perturbation theory (SAPT) analysis at sSAPT0/jun-cc-pVDZ level was carried out by PSI4 1.3.2 code<sup>12</sup>. The ion- $\pi$  interaction of graphene is stronger than that of C<sub>14</sub> since the induction energy between the Li<sup>+</sup> ion and graphene is -50.8 kcal/mol, far lower than that between the Li<sup>+</sup> ion and C<sub>14</sub> (-26.6 kcal/mol). And the electrostatic energy between the Li<sup>+</sup> ion and graphene is calculated to be -5.6 kcal/mol, indicating a favorable mutual interaction. In contrast, the electrostatic energy between the Li<sup>+</sup> ion and C<sub>14</sub> is positive, measuring 2.3 kcal/mol, which hinders their combination.

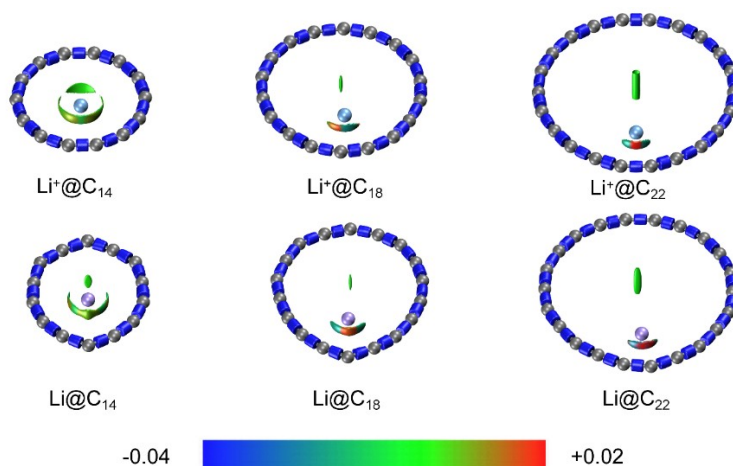

**Figure S5.** The interaction region indicator (IRI) maps of  $\text{Li}^+/\text{Li}$  interacted with  $\text{C}_{14}$ ,  $\text{C}_{18}$  and  $\text{C}_{22}$ .

The relevant  $\text{sign}(\lambda^2)\rho$  function can be visualized on IRI isosurfaces using different colors. In this representation, the blue region indicates a notable attraction, similar to H-bond and halogen-bond interactions. The green region represents a very weak interatomic van der Waals (vdW) interaction, while the red region signifies notable repulsion, such as steric effects within the ring and cage structures. Notably, there is a weak interaction observed in the green region between cyclocarbons and  $\text{Li}^+/\text{Li}$ , and the size of the isosurface coincides with the trend of adsorption energy (refer to Table S2). As the size of the ring increases, the size of the isosurface shrinks, and while the attraction becomes stronger, indicated by a more solid blue color, the adverse repulsion becomes more pronounced, represented by a more intense red color.

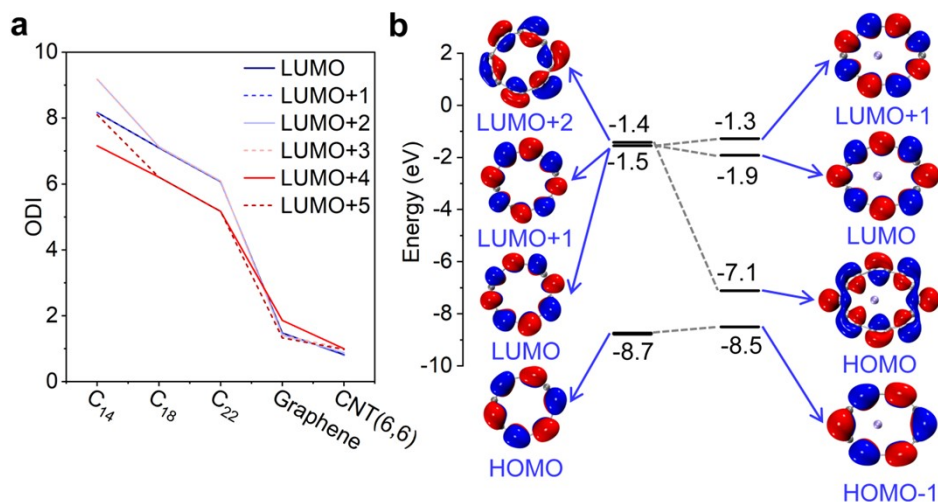

**Figure S6. The orbital analysis of C<sub>14</sub>, C<sub>18</sub>, C<sub>22</sub>, Graphene, CNT and Li@C<sub>14</sub>.**

**(a)**, The orbital delocalization index (ODI) of LUMO, LUMO+1, LUMO+2, LUMO+3, LUMO+4 and LUMO+5 for C<sub>14</sub>, C<sub>18</sub>, C<sub>22</sub>, graphene and CNT. For all cyclocarbons, the LUMO and LUMO+1 orbitals are out-plane  $\pi$  orbitals, while the LUMO+2 and LUMO+3 orbitals are in-plane  $\pi$  orbitals, the unique characteristic which is not found in Grap and CNT. In the case of C<sub>14</sub>, the in-plane  $\pi$  orbitals have the largest ODI value of 9.2, indicating that LUMO+2 and LUMO+3 in C<sub>14</sub> exhibit the highest electron concentration and the strongest electron adsorption compared to its out-of-plane  $\pi$  orbitals, with an ODI of 8.2, and the LUMO+4 orbital in Grap and CNT, with ODI of 1.9 and 1.0 each. **(b)**, Frontier molecular orbitals of C<sub>14</sub> and Li@C<sub>14</sub>. The LUMO+2 orbital in C<sub>14</sub> adopts a similar shape to the in-plane  $\pi$  orbital. Red and blue regions (isovalue = 0.025 a.u.) denote the positive and negative orbital phases, respectively. This similarity is also observed in the HOMO orbital of the Li@C<sub>14</sub> complex, indicating that the valence shell electron of Li is transferred to the unoccupied LUMO+2 orbital of the C<sub>14</sub> ring, resulting in the formation of the occupied HOMO orbital of the complex. This electron transfer leads to a decrease in energy from -1.4 eV to -7.1 eV. Furthermore, the HOMO orbital in C<sub>14</sub> becomes the HOMO-1 orbital in Li@C<sub>14</sub>, while there are no changes observed in the LUMO and LUMO+1 orbitals after interaction with Li.

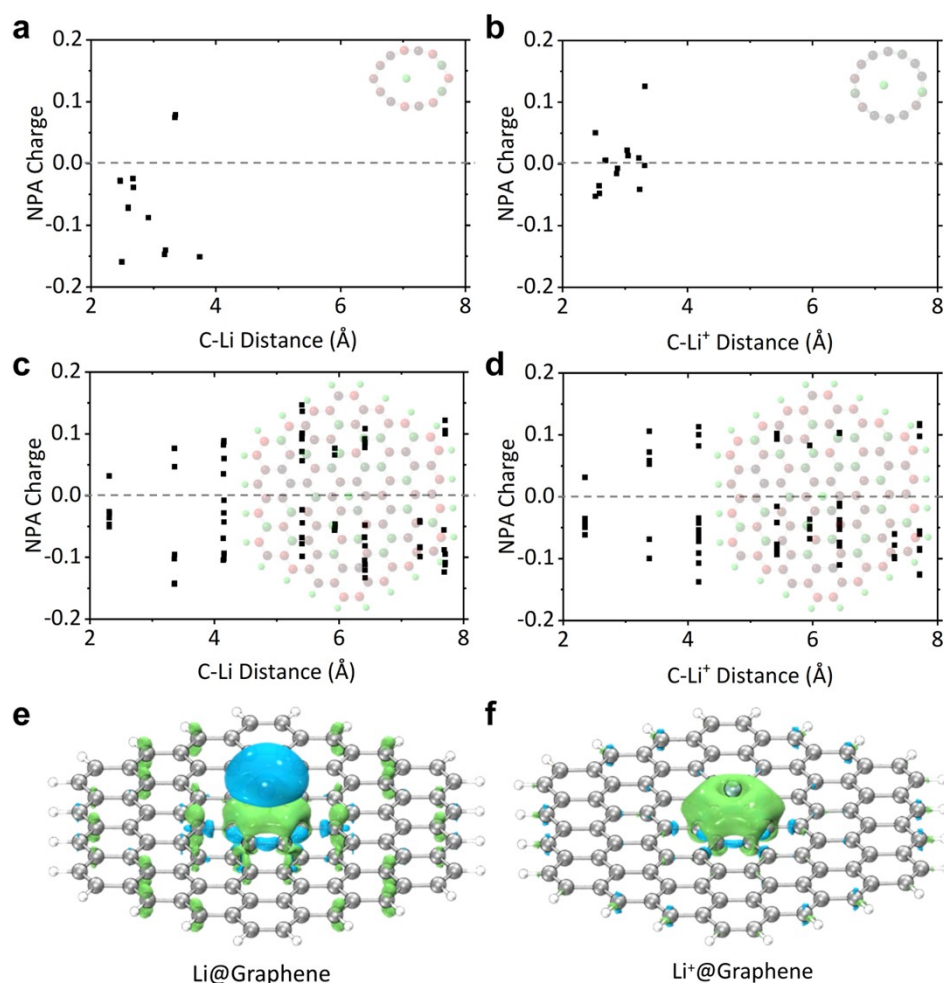

**Figure S7. The charge analysis of Li/Li<sup>+</sup>@C<sub>14</sub> and Li/Li<sup>+</sup>@Graphene.**

(a), The natural population analysis (NPA) charge of C atoms in Li@C<sub>14</sub>. The NPA charge of the Li atom is 0.967, indicating that it gives its valence electron to C<sub>14</sub> and then turns into a positive Li<sup>+</sup> cation. Most of the C atoms, close to the positive Li<sup>+</sup> cation, present negative charges to generate a strong electrostatic attraction with the Li<sup>+</sup> cation. And the most negative value of NPA charge is -0.16 on the C atom, which is only 2.49 Å far from the Li<sup>+</sup> cation. (b), The NPA charge of C atoms in Li<sup>+</sup>@C<sub>14</sub>. The NPA charge of the Li<sup>+</sup> ion is 0.968, indicating that there is no evident charge transfer between C<sub>14</sub> and Li<sup>+</sup> ion, conforming to the presence of ion- $\pi$  interaction. The electrostatic attraction between the Li<sup>+</sup> ion and C<sub>14</sub> is weaker compared to that between the Li atom and C<sub>14</sub> because approximately half of the C atoms exhibit negative charges around -0.05, far higher than that in Li@C<sub>14</sub>. And other C atoms show positive charge, further enhancing mutual electrostatic exclusion to Li<sup>+</sup> ion. (c), The NPA charge of C atoms in Li@Graphene. The NPA charge of the Li atom is 0.951, indicating that it turns into a Li<sup>+</sup> cation with a positive charge. Although there is a similar amount of charge transfer from the Li atom to the C atoms in Li@Graphene compared to Li@C<sub>14</sub>, the negative charges in Li@Graphene are dispersed by the presence of numerous C atoms with delocalized  $\pi$  orbitals. Consequently, the electrostatic attraction in Li@Graphene is weaker than that in Li@C<sub>14</sub>, primarily attributed to the slightly higher negative charge (-0.05) of the C atoms closest to the Li atom in graphene. (d), The NPA charge of C atoms in Li<sup>+</sup>@Graphene. The NPA charge of the Li<sup>+</sup> ion is determined to be 0.951, indicating a similar ion- $\pi$  interaction between Li<sup>+</sup> and graphene as that in Li<sup>+</sup>@C<sub>14</sub>. (e), The electron density difference (EDD) map of Li@Graphene.

Green and blue isosurfaces (isovalue = 0.0015 a.u.) represent the regions where the electron density is increased and decreased, respectively, after complexation between the Li atom and graphene. Electron transfer occurs from the Li atom, depicted by the blue isosurface, to the  $\pi$  orbitals of the nearest carbon atoms in graphene, represented by the green isosurface. And the remaining carbon atoms disperse the acquired electrons, verified by scattered green isosurfaces within the carbon atoms. This observation confirms that the dispersed negative charge results in a weaker electrostatic attraction compared to Li@C<sub>14</sub>. **(f)**, The EDD map of Li<sup>+</sup>@Graphene. There is no electron transfer between Li<sup>+</sup> and graphene, the same as in Li<sup>+</sup>@C<sub>14</sub>.

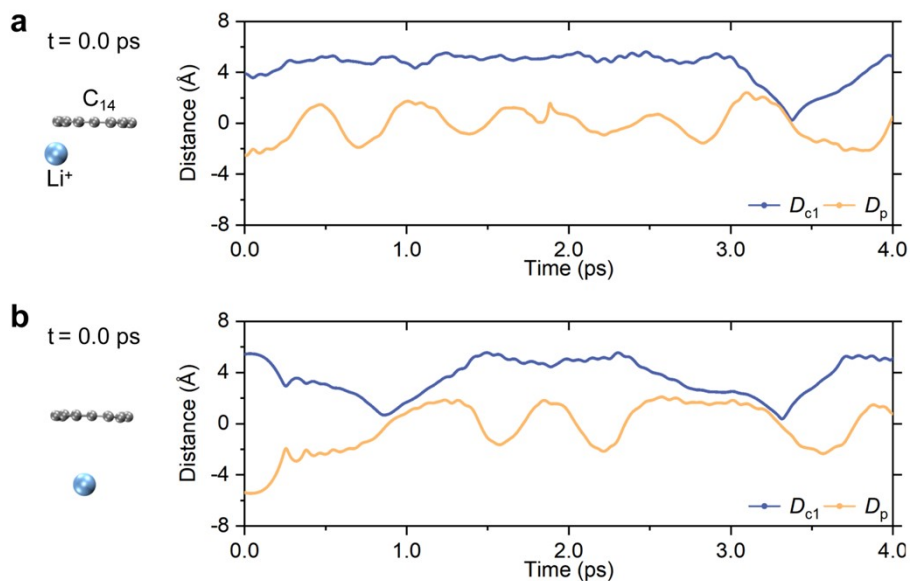

**Figure S8. 4.0 ps trajectory of *ab initio* molecular dynamics simulations of outside  $\text{Li}^+$  ion, at different locations, across  $\text{C}_{14}$  at 300.00K, described by  $D_p$  (Blue) and  $D_{c1}$  (Yellow).**

The level of  $\omega\text{B97XD/def-TZVP}$  is adopted for *ab initio* molecular dynamics simulation.  $D_{c1}$  is the distance between the  $\text{Li}^+$  ion or Li atom and the mass center. And  $D_p$  is the shortest perpendicular distance from the  $\text{Li}^+$  ion or Li atom to the plane of  $\text{C}_{14}$ . **(a)**, The dynamical course of outside  $\text{Li}^+$  positioned 3.9 Å away from the center of  $\text{C}_{14}$  and -2.5 Å away from its plane initially. At 3.4 ps, both the  $D_p$  and  $D_{c1}$  values approach 0.0 Å, indicating that the  $\text{Li}^+$  ion has completely entered the  $\text{C}_{14}$  ring. Subsequently, these values deviate from 0.0 Å, indicating that the  $\text{Li}^+$  ion can freely move out of the ring. **(b)**, The dynamical course of outside  $\text{Li}^+$  positioned 5.4 Å away from the center of  $\text{C}_{14}$  and -5.4 Å away from its plane initially. At 0.9 ps and 3.3 ps, both the  $D_p$  and  $D_{c1}$  values approach 0.0 Å, indicating that the  $\text{Li}^+$  ion can entirely enter into and leave the  $\text{C}_{14}$  ring twice within a duration of 4.0 ps.

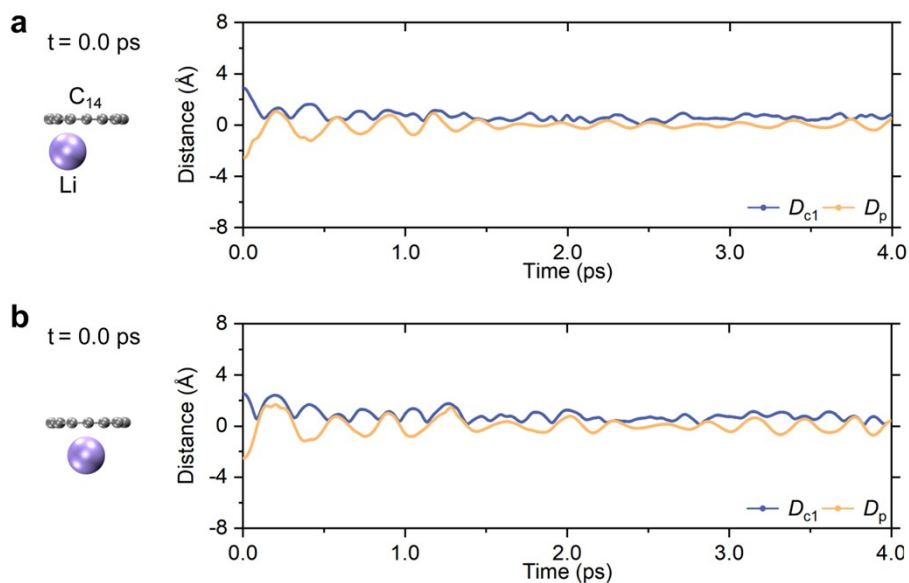

**Figure S9. 4.0 ps trajectory of *ab initio* molecular dynamics simulations of outside Li atom, at different locations, adsorbed by C<sub>14</sub> at 300.00K, described by D<sub>p</sub> (Blue) and D<sub>c1</sub> (Yellow).**

The level of ωB97XD/def-TZVP is adopted for *ab initio* molecular dynamics simulation. D<sub>c1</sub> is the distance between the Li<sup>+</sup> ion or the Li atom and the mass center. And D<sub>p</sub> is the shortest perpendicular distance from the Li<sup>+</sup> ion or the Li atom to the plane of C<sub>14</sub>. **(a)**, The dynamical course of the Li atom located 2.8 Å away from the center of C<sub>14</sub> and -2.5 Å away from its plane. At 0.1 ps, both D<sub>p</sub> and D<sub>c1</sub> values approach 0.0 Å, indicating that the Li atom entirely enters the C<sub>14</sub> ring. Subsequently, these values fluctuate around 0.0 Å, suggesting that Li moves up and down within a limited area but cannot entirely escape the influence of C<sub>14</sub>. **(b)**, The dynamical course of the Li atom located 2.5 Å away from the center of C<sub>14</sub> and -2.5 Å away from its plane. At 0.1 ps, both D<sub>p</sub> and D<sub>c1</sub> values are close to 0.0 Å, indicating that the Li atom is entirely captured inside the C<sub>14</sub> ring. Subsequently, these values fluctuate around this value, suggesting that the Li atom moves up and down within the ring.

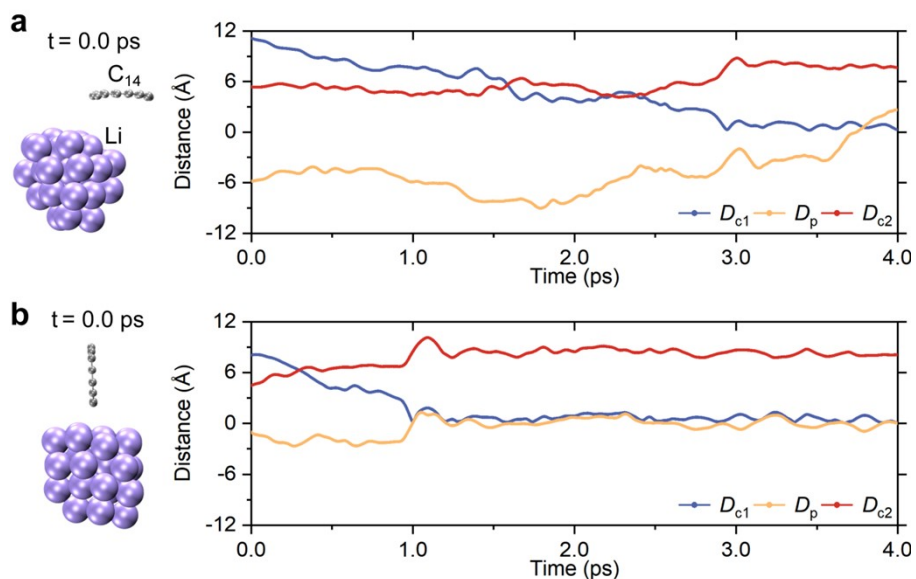

**Figure S10.** 4.0 ps trajectory of *ab initio* molecular dynamics simulations of outside Li in a cluster at different locations, adsorbed by C<sub>14</sub> at 300K, described by D<sub>p</sub> (Blue), D<sub>c1</sub> (Yellow) and D<sub>c2</sub> (Red).

The level of  $\omega$ B97XD/def-TZVP is adopted for *ab initio* molecular dynamics simulation.  $D_{c1}$  is the distance between the Li<sup>+</sup> ion or the Li atom and the mass center.  $D_p$  is the shortest perpendicular distance from the Li<sup>+</sup> ion or the Li atom to the plane of C<sub>14</sub>. And  $D_{c2}$  is the distance between the separated Li atom and the geometric center of the remaining Li clusters. **(a)**, The dynamical course of the Li atom, in the cluster, located at 11.0 Å from the center of C<sub>14</sub> and -5.8 Å from its plane. At 2.9 ps, the values of  $D_p$  and  $D_{c1}$  are both close to 0.0 Å, indicating that the Li atom has entirely entered into the C<sub>14</sub> ring. Additionally,  $D_{c2}$  experiences a slight rise from 5.3 Å to 6.5 Å, revealing that the Li atom is separated from the cluster. Subsequently, the values of  $D_p$  and  $D_{c1}$  remain around 0.0 Å, suggesting that the Li atom moves up and down within a limited area but remains influenced by the presence of C<sub>14</sub> and does not entirely escape from it. **(b)**, The dynamical course of the Li atom in the cluster, located at 8.0 Å from the center of C<sub>14</sub> and -1.0 Å from its plane. At 1.0 ps, both  $D_p$  and  $D_{c1}$  values are close to 0.0 Å, and the  $D_{c2}$  value increases by approximately 4.0 Å, suggesting that the Li atom becomes separated from the cluster and is captured into the C<sub>14</sub> ring.



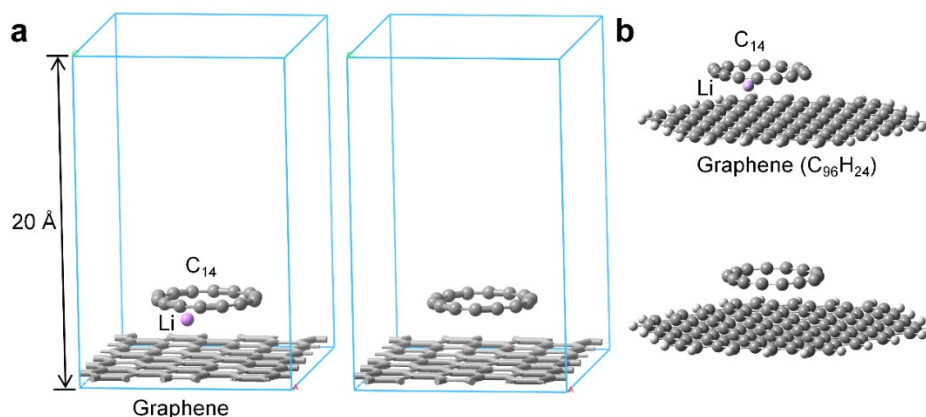

**Figure S11. The geometries of Li@C<sub>14</sub>-Graphene and C<sub>14</sub>@Graphene.**

(a), The periodical geometries of Li@C<sub>14</sub>-Graphene and C<sub>14</sub>@Graphene. The periodical geometries of a Li atom interacting with C<sub>14</sub> and graphene, and C<sub>14</sub> adsorbed by graphene base are optimized by VASP, using the DFT-D3 corrected GGA-PBE method. The shortest perpendicular distance from the Li atom to C<sub>14</sub> is 0.7 Å, and that from the C<sub>14</sub> to graphene both are around 3.1 Å. (b), The geometries of Li@C<sub>14</sub>-Graphene and C<sub>14</sub>@Graphene, using the density functional theory. The geometries of a Li atom interacting with C<sub>14</sub> and graphene, and C<sub>14</sub> adsorbed by graphene base are optimized at the level of ωB97XD/6-311G(d). There are similarities between the values of the shortest perpendicular distance from the Li atom to C<sub>14</sub> (0.9 Å) as well as that from the C<sub>14</sub> to graphene (3.2 Å) in density functional theory and those values in periodical geometries. All the adsorption energies are exhibited in Supplementary Table S4.

**Table S1. The adsorption energy of Li<sup>+</sup>/Li combined with conventional carbon-based materials in previous research.**

| Carbon-based materials                   | $E_{\text{adsLi}^+}$ (kcal/mol) | $E_{\text{adsLi}}$ (kcal/mol) | Reference |
|------------------------------------------|---------------------------------|-------------------------------|-----------|
| CNT-(7,0)                                | -38.3                           | -20.1                         |           |
| CNT-(10,0)                               | -49.8                           | -28.1                         | 13        |
| CNT-(12,0)                               | -48.9                           | -30.9                         |           |
| CNT-(6,6)                                | -55.5                           | -28.1                         | 14        |
| Graphene-C <sub>96</sub> H <sub>26</sub> | -56.0                           | -                             | 15        |
| Graphene-C <sub>96</sub> H <sub>26</sub> | -55.8                           | -                             | 16        |
| Graphene-4×4                             | -60.2                           | -                             | 17        |
| Graphene-C <sub>24</sub> H <sub>12</sub> | -                               | -6.2                          |           |
| Graphene-C <sub>54</sub> H <sub>18</sub> | -                               | -12.5                         | 18        |
| Graphene-C <sub>92</sub> H <sub>24</sub> | -                               | -18.9                         |           |
| Graphene-4×4                             | -                               | -28.1                         | 19        |
| Graphene-4×4                             | -                               | -31.4                         | 20        |
| Graphene-3×3                             | -                               | -31.4                         | 21        |

**Table S2. The adsorption energy of Li<sup>+</sup>/Li combined inside and outside C<sub>14</sub>, C<sub>18</sub> and C<sub>22</sub>.**

| Cyclocarbon     | Li <sup>+</sup>               |                                | Li                            |                                |
|-----------------|-------------------------------|--------------------------------|-------------------------------|--------------------------------|
|                 | $E_{\text{adsin}}$ (kcal/mol) | $E_{\text{adsout}}$ (kcal/mol) | $E_{\text{adsin}}$ (kcal/mol) | $E_{\text{adsout}}$ (kcal/mol) |
| C <sub>14</sub> | -28.7                         | -27.6                          | -51.9                         | -39.7                          |
| C <sub>18</sub> | -28.3                         | -24.6                          | -43.3                         | -38.7                          |
| C <sub>22</sub> | -28.8                         | -25.5                          | -40.4                         | -37.6                          |

**Table S3. The length of the longest axis (*d*) and deform degree (*D*) for cyclocarbons interacted with Li<sup>+</sup>/Li.**

| Cyclocarbon     | <i>d</i> (Å)    |      | <i>D</i> (%)    |       |
|-----------------|-----------------|------|-----------------|-------|
|                 | Li <sup>+</sup> | Li   | Li <sup>+</sup> | Li    |
| C <sub>14</sub> | 5.84            | 6.66 | 2.18            | 16.47 |
| C <sub>18</sub> | 7.70            | 8.33 | 0.83            | 8.61  |
| C <sub>22</sub> | 9.33            | 9.57 | 0.78            | 7.59  |

\*The deform degree can be calculated as  $D(\%) = (d_{\text{Li}^+/\text{Li}@C_n} - d_{C_n}) / d_{C_n} \times 100$ , Where  $d_{\text{Li}^+/\text{Li}@C_n}$  and  $d_{C_n}$  are the lengths of the longest axis of cyclocarbons after and before Li<sup>+</sup>/Li adsorption, respectively. The original lengths  $d_{C_{14}}$ ,  $d_{C_{18}}$  and  $d_{C_{22}}$  are 5.72 Å, 7.39 Å and 9.02 Å before adsorption.

**Table S4. The adsorption energy of C<sub>14</sub> or Li interacting with graphene or C<sub>14</sub> calculated by PBE and ωb97xd methods.**

| Base Material   | $E_{\text{adsC}_{14}}$ (kcal mol) |        | $E_{\text{adsLi}}$ (kcal/mol) |        |
|-----------------|-----------------------------------|--------|-------------------------------|--------|
|                 | PBE                               | ωb97xd | PBE                           | ωb97xd |
| Graphene        | -16.7                             | -10.1  | -31.0                         | -8.5   |
| C <sub>14</sub> | -5.7                              | -3.7   | -42.5                         | -51.9  |

## Section S2. Sodium-ion batteries and potassium-ion batteries

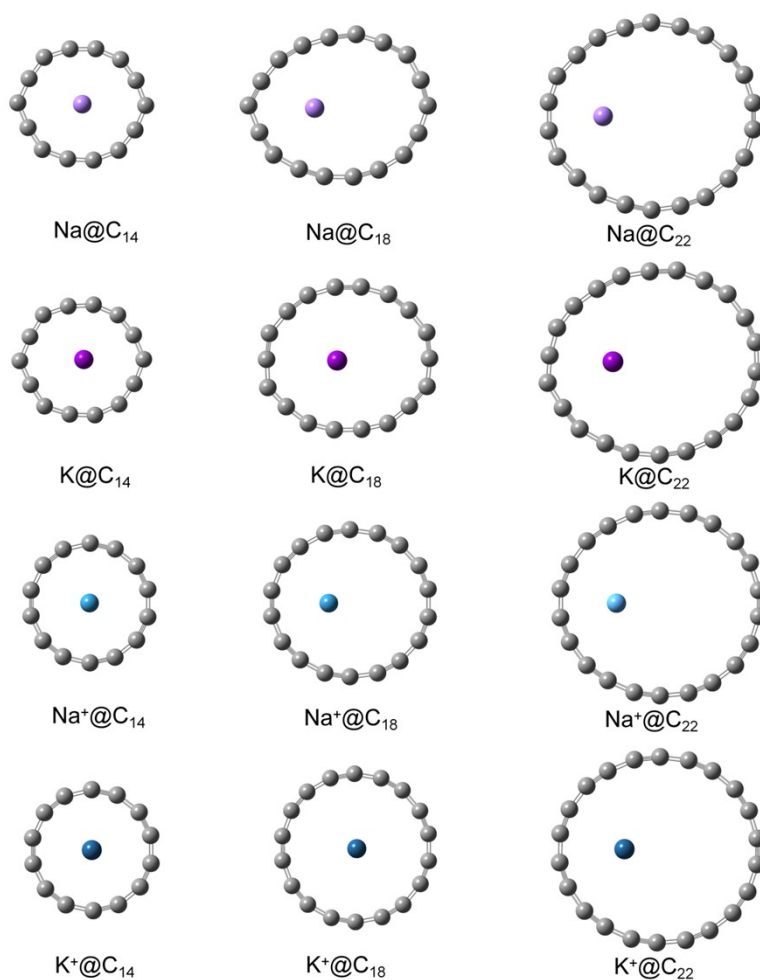

**Figure S12. Top view of geometries for Na/K, Na<sup>+</sup>/K<sup>+</sup> combined inside C<sub>14</sub>, C<sub>18</sub> and C<sub>22</sub>.**

All geometries are optimized by Gaussian at the level of  $\omega$ B97XD/6-311+G(2d). The distortion of cyclocarbons interacted with Na/K is larger than that with Na<sup>+</sup>/K<sup>+</sup> (refer to Table S11 and Table S12)

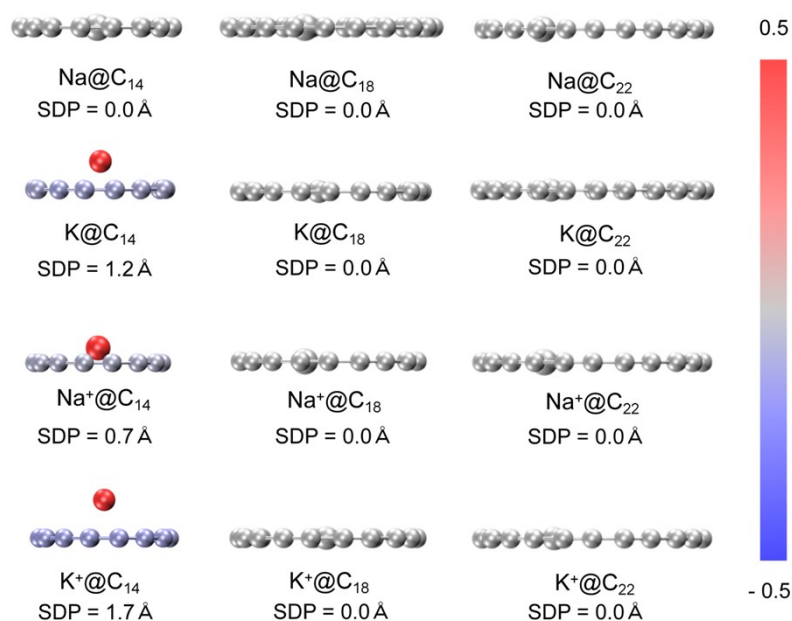

**Figure S13. Side view of geometries and the span of deviation from plane (SDP) for Na<sup>+</sup>/Na, K<sup>+</sup>/K combined inside C<sub>14</sub>, C<sub>18</sub> and C<sub>22</sub>.**

Atoms and ions are colored in different colors based on their  $d^s$  values—the more solid the red, the more positive the value. SDP is equal to  $d^s_{\max} - d^s_{\min}$ <sup>22</sup>, used to evaluate whether alkali ions and alkali atoms can be completely encapsulated by cyclocarbon and whether they can freely pass across the inner cyclocarbon. The value of SDP is larger than 0.0 Å in K@C<sub>14</sub>, Na<sup>+</sup>@C<sub>14</sub>, and K<sup>+</sup>@C<sub>14</sub> complexes, indicating that C<sub>14</sub> is unable to entirely adsorb K, Na<sup>+</sup>, and K<sup>+</sup> into the ring. This suggests that C<sub>14</sub> tends to obstruct the movement of these atoms and ions, preventing them from fully entering the ring structure. In contrast, C<sub>18</sub> and C<sub>22</sub> allow all the ions and atoms to reside within the same plane, exhibiting optimal host-guest interactions to be a suitable carbon-based host material for mitigating Na and K dendrite deposition without impeding Na<sup>+</sup> and K<sup>+</sup> ion diffusion.

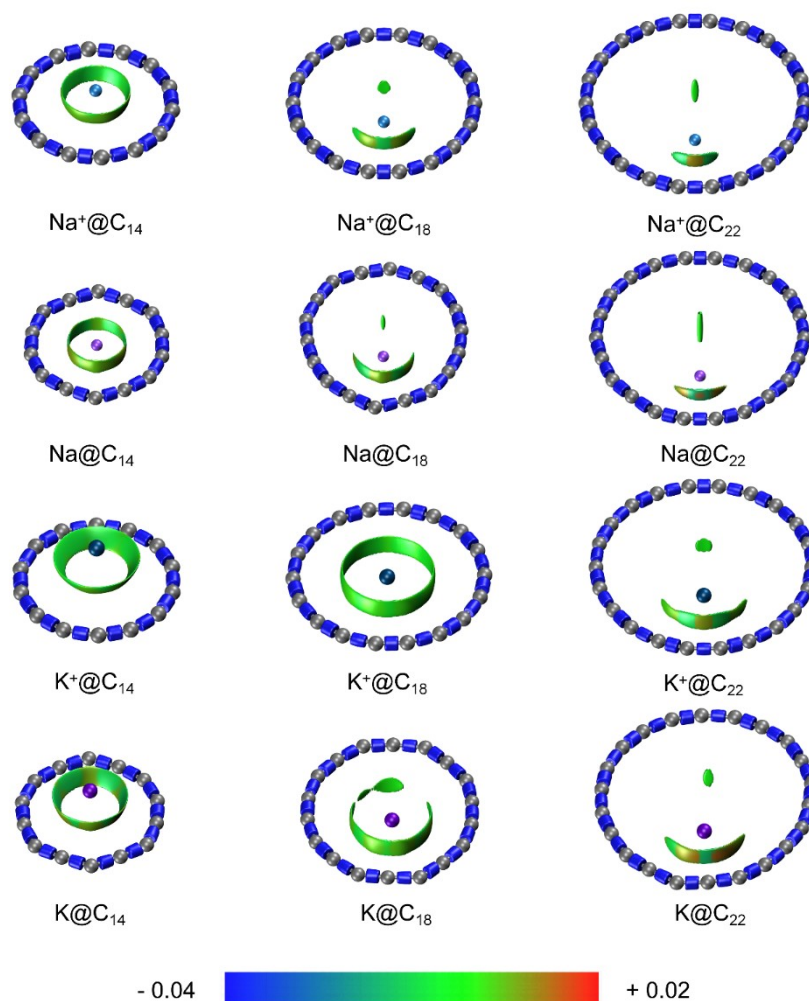

**Figure S14.** The interaction region indicator (IRI) maps of Na<sup>+</sup>/Na and K<sup>+</sup>/K interacted with C<sub>14</sub>, C<sub>18</sub> and C<sub>22</sub>.

A weak interaction, characterized by the green region, is observed between cyclocarbon and Na<sup>+</sup>/Na as well as K<sup>+</sup>/K. This interaction is accompanied by a slight repulsion, indicated by the orange region.



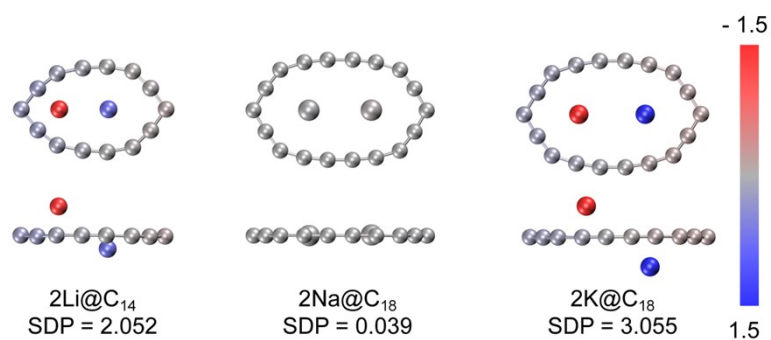

**Figure S15. Geometries and the span of deviation from plane (SDP) for 2 Li atoms combined inside C<sub>14</sub>, and 2 Na atoms or 2 K atoms combined inside C<sub>18</sub>.**

The value of SDP is larger than 0.0 Å in 2Li@C<sub>14</sub>, 2Na@C<sub>18</sub> and 2K@C<sub>18</sub> complexes, suggesting C<sub>14</sub> only can accommodate one Li atom, and C<sub>18</sub> only can accommodate one Na atom or K atom.

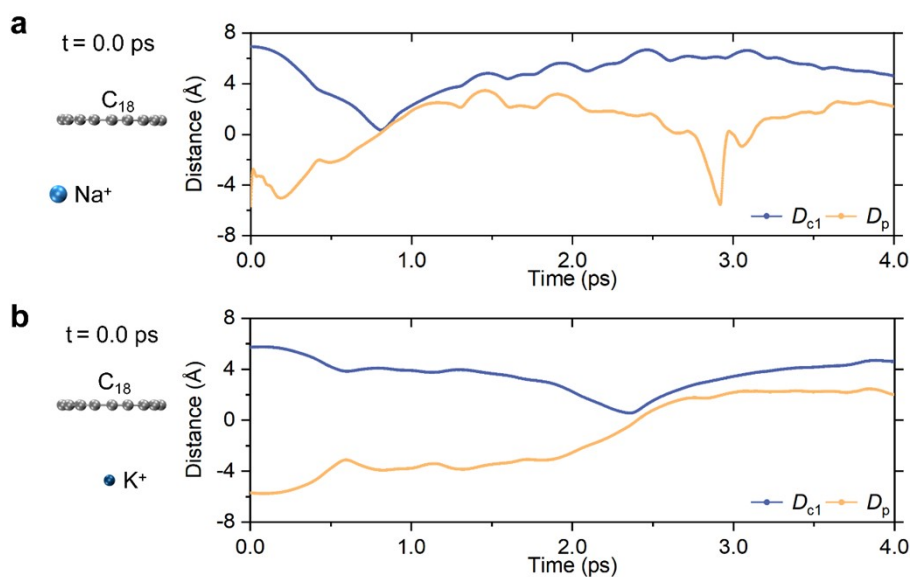

**Figure S16. 4.0 ps trajectory of ab initio molecular dynamics simulations of outside Na<sup>+</sup> ion and K<sup>+</sup> ion across C<sub>18</sub> at 300.00K, described by  $D_p$  (Blue) and  $D_{c1}$  (Yellow).**

The level of  $\omega$ B97XD/def-TZVP is adopted for *ab initio* molecular dynamics simulation.  $D_{c1}$  is the distance between the Li<sup>+</sup> ion or Li atom and the mass center. And  $D_p$  is the shortest perpendicular distance from the Li<sup>+</sup> ion or Li atom to the plane of C<sub>18</sub>. **(a)**, The dynamical course of the Na<sup>+</sup> ion located 6.9 Å away from the center of C<sub>18</sub> and -5.6 Å away from its plane. At 0.8 ps, both  $D_p$  and  $D_{c1}$  values approach 0.0 Å, indicating that the Na<sup>+</sup> ion entirely enters the C<sub>14</sub> ring. Subsequently, these values deviate from 0.0 Å, indicating that the Na<sup>+</sup> ion can freely move out of the ring. **(b)**, The dynamical course of the K<sup>+</sup> ion located 5.7 Å away from the center of C<sub>18</sub> and -5.7 Å away from its plane. At 2.4 ps, both  $D_p$  and  $D_{c1}$  values are close to 0.0 Å, indicating that the K<sup>+</sup> ion is entirely captured inside the C<sub>14</sub> ring. These values then deviate from 0.0 Å, suggesting that the reversible freedom of K<sup>+</sup> ion diffusion would not be impeded by C<sub>18</sub>.

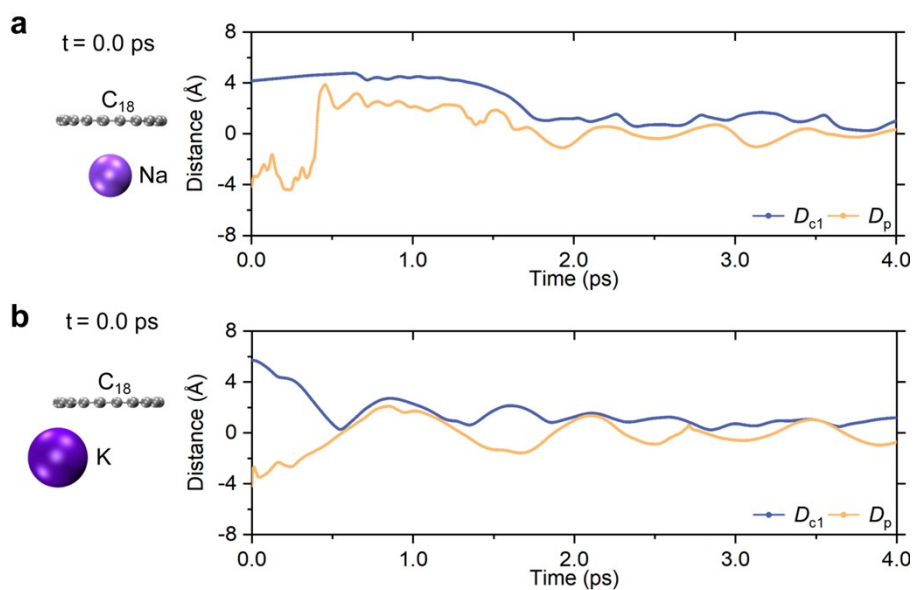

**Figure S17. 4.0 ps trajectory of ab initio molecular dynamics simulations of outside Na atom and K atom, at different locations, interacting with C<sub>18</sub>, described by D<sub>p</sub> (Blue) and D<sub>c1</sub> (Yellow).**

The level of  $\omega$ B97XD/def-TZVP is adopted for *ab initio* molecular dynamics simulation.  $D_{c1}$  is the distance between the Li<sup>+</sup> ion or Li atom and the mass center. And  $D_p$  is the shortest perpendicular distance from the Li<sup>+</sup> ion or Li atom to the plane of C<sub>18</sub>. **(a)**, The dynamical course of the Na atom located 4.1 Å away from the center of C<sub>18</sub> and -4.1 Å away from its plane. At 1.8 ps, both  $D_p$  and  $D_{c1}$  values approach 0.0 Å, indicating that the Na atom entirely enters the C<sub>18</sub> ring. Subsequently, these values fluctuate around 0.0 Å, suggesting that the Na atom moves up and down within a limited area but cannot entirely escape the influence of C<sub>18</sub>. **(b)**, The dynamical course of the K atom located 5.7 Å away from the center of C<sub>18</sub> and -4.2 Å away from its plane. At 0.6 ps, both  $D_p$  and  $D_{c1}$  values are close to 0.0 Å, indicating that the K atom is entirely captured inside the C<sub>18</sub> ring. Subsequently, these values fluctuate around this value, suggesting that the K atom moves up and down within the ring.

**Table S5. The adsorption energy of Na<sup>+</sup>/Na combined with conventional carbon-based materials in previous research.**

| Carbon-based materials                   | $E_{\text{adsNa}^+}$ (kcal/mol) | $E_{\text{adsNa}}$ (kcal/mol) | Reference |
|------------------------------------------|---------------------------------|-------------------------------|-----------|
| Graphene-C <sub>94</sub> H <sub>26</sub> | -41.3                           | -                             | 16        |
| Graphene-4×4                             | -                               | -16.4                         | 23        |
| Graphene-3×3                             | -                               | -16.6                         | 21        |
| Graphene-4×4                             | -                               | -14.3                         | 19        |

**Table S6. The adsorption energy of K<sup>+</sup>/K combined with conventional carbon-based materials in previous research.**

| Carbon-based materials                   | $E_{\text{adsK}^+}$ (kcal/mol) | $E_{\text{adsK}}$ (kcal/mol) | Reference |
|------------------------------------------|--------------------------------|------------------------------|-----------|
| Graphene-C <sub>96</sub> H <sub>26</sub> | -34.1                          | -                            | 16        |
| Graphene-3×3                             | -                              | -18.7                        | 21        |
| Graphene-4×4                             | -                              | -24.2                        | 19        |

**Table S7. The adsorption energy of Na<sup>+</sup>/Na combined inside and outside C<sub>14</sub>, C<sub>18</sub> and C<sub>22</sub>.**

| Cyclocarbon     | Na <sup>+</sup>               |                                | Na                            |                                |
|-----------------|-------------------------------|--------------------------------|-------------------------------|--------------------------------|
|                 | $E_{\text{adsin}}$ (kcal/mol) | $E_{\text{adsout}}$ (kcal/mol) | $E_{\text{adsin}}$ (kcal/mol) | $E_{\text{adsout}}$ (kcal/mol) |
| C <sub>14</sub> | -21.2                         | -17.8                          | -50.2                         | -31.1                          |
| C <sub>18</sub> | -20.1                         | -16.5                          | -41.7                         | -30.5                          |
| C <sub>22</sub> | -19.5                         | -17.2                          | -36.7                         | -29.3                          |

**Table S8. The adsorption energy of K<sup>+</sup>/K combined inside and outside C<sub>14</sub>, C<sub>18</sub> and C<sub>22</sub>.**

| Cyclocarbon     | K <sup>+</sup>                |                                | K                             |                                |
|-----------------|-------------------------------|--------------------------------|-------------------------------|--------------------------------|
|                 | $E_{\text{adsin}}$ (kcal/mol) | $E_{\text{adsout}}$ (kcal/mol) | $E_{\text{adsin}}$ (kcal/mol) | $E_{\text{adsout}}$ (kcal/mol) |
| C <sub>14</sub> | -13.6                         | -11.4                          | -56.3                         | -38.2                          |
| C <sub>18</sub> | -16.1                         | -11.1                          | -54.8                         | -38.4                          |
| C <sub>22</sub> | -14.3                         | -11.5                          | -48.8                         | -37.6                          |

**Table S9. The adsorption energy and the cell voltage of Na<sup>+</sup>/Na combined with different carbon-based materials calculated in this work.**

| Carbon-based materials | $E_{\text{adsNa}^+}$<br>(kcal/mol) | $E_{\text{adsNa}}$<br>(kcal/mol) | $\Delta E_{\text{tot}}$<br>(kcal/mol) | $V_{\text{cell}}$<br>(V) |
|------------------------|------------------------------------|----------------------------------|---------------------------------------|--------------------------|
| C <sub>14</sub>        | -21.2                              | -50.2                            | 29.0                                  | -1.3                     |
| C <sub>18</sub>        | -20.1                              | -41.7                            | 21.6                                  | -0.9                     |
| C <sub>22</sub>        | -19.5                              | -36.7                            | 17.2                                  | -0.8                     |
| DV                     | -50.4                              | -56.4                            | 5.0                                   | -0.3                     |
| Graphene               | -39.5                              | -15.2                            | -24.3                                 | 1.1                      |
| CNT(6,6)               | -44.3                              | -36.8                            | -7.5                                  | 0.3                      |



**Table S10.** The adsorption energy and the cell voltage of  $K^+/K$  combined with different carbon-based materials calculated in this work.

| Carbon-based materials | $E_{\text{adsK}^+}$<br>(kcal/mol) | $E_{\text{adsK}}$<br>(kcal/mol) | $\Delta E_{\text{tot}}$<br>(kcal/mol) | $V_{\text{cell}}$<br>(V) |
|------------------------|-----------------------------------|---------------------------------|---------------------------------------|--------------------------|
| C <sub>14</sub>        | -13.6                             | -56.3                           | 42.7                                  | -1.8                     |
| C <sub>18</sub>        | -16.1                             | -54.8                           | 38.7                                  | -1.7                     |
| C <sub>22</sub>        | -14.3                             | -48.8                           | 34.5                                  | -1.5                     |
| DV                     | -42.3                             | -68.4                           | 26.1                                  | -1.1                     |
| Graphene               | -32.5                             | -26.5                           | - 6.0                                 | 0.3                      |
| CNT(6,6)               | -39.8                             | -51.3                           | 11.5                                  | -0.5                     |

**Table S11. The length of the longest axis ( $d$ ) and deform degree ( $D$ ) for cyclocarbons interacted with Na<sup>+</sup>/Na.**

| Cyclocarbon     | $d$ (Å)         |      | $D$ (%)         |       |
|-----------------|-----------------|------|-----------------|-------|
|                 | Na <sup>+</sup> | Na   | Na <sup>+</sup> | Na    |
| C <sub>14</sub> | 5.76            | 6.21 | 4.23            | 12.71 |
| C <sub>18</sub> | 7.64            | 8.32 | 3.34            | 12.51 |
| C <sub>22</sub> | 9.38            | 9.47 | 0.04            | 7.54  |

**Table S12. The length of the longest axis ( $d$ ) and deform degree ( $D$ ) for cyclocarbons interacted with  $K^+/K$ .**

| Cyclocarbon | $d$ (Å) |      | $D$ (%) |      |
|-------------|---------|------|---------|------|
|             | $K^+$   | $K$  | $K^+$   | $K$  |
| $C_{14}$    | 5.76    | 6.15 | 3.45    | 6.11 |
| $C_{18}$    | 7.39    | 7.95 | 3.92    | 4.96 |
| $C_{22}$    | 9.33    | 9.69 | 3.43    | 7.40 |

### Supplementary References.

- (1) Aydinol, M. K.; Kohan, A. F.; Ceder, G.; Cho, K.; Joannopoulos, J. Ab initio study of lithium intercalation in metal oxides and metal dichalcogenides. *Phys. Rev. B* **1997**, *56* (3), 1354-1365.
- (2) Ceder, G.; Aydinol, M. K.; Kohan, A. F. Application of first-principles calculations to the design of rechargeable Li-batteries. *Comput. Mater. Sci* **1997**, *8* (1-2), 161-169.
- (3) Meng, Y. S.; Arroyo-de Dompablo, M. E. First principles computational materials design for energy storage materials in lithium ion batteries. *Energy Environ. Sci.* **2009**, *2* (6), 589-609.
- (4) Jug, A.; Francois, P. Recherches sur la gomtrie de quelques hydrocarbures non-alternants: son influence sur les nergies de transition, une nouvelle dffinition de l'aromaticit. *Theor. Chim. Acta* **1967**, *8* (3), 249-259.
- (5) Kresse, G.; Hafner, J. Ab initio Hellmann-Feynman molecular dynamics for liquid metals. *J. Non-Cryst. Solids* **1993**, *156-158*, 956-960.
- (6) Kresse, G.; Hafner, J. Ab initio molecular-dynamics simulation of the liquid-metal-amorphous-semiconductor transition in germanium. *Phys. Rev* **1994**, *49* (20), 14251-14269.
- (7) Kresse, G.; Furthmüller, J. Efficiency of ab-initio total energy calculations for metals and semiconductors using a plane-wave basis set. *Comput. Mater. Sci* **1996**, *6* (1), 15-50.
- (8) Kresse, G.; Furthmuller, J. Efficient iterative schemes for ab initio total-energy calculations using a plane-wave basis set. *Phys. Rev* **1996**, *54* (16), 11169-11186.
- (9) Kresse, G.; Joubert, D. From ultrasoft pseudopotentials to the projector augmented-wave method. *Phys. Rev. B* **1999**, *59* (3), 1758-1775.
- (10) Perdew, J. P.; Burke, K.; Ernzerhof, M. Generalized Gradient Approximation Made Simple. *Phys. Rev. Lett.* **1996**, *77* (18), 3865-3868.
- (11) Grimme, S.; Antony, J.; Ehrlich, S.; Krieg, H. A consistent and accurate ab initio parametrization of density functional dispersion correction (DFT-D) for the 94 elements H-Pu. *J. Chem. Phys.* **2010**, *132* (15), 154104.
- (12) Parrish, R. M.; Burns, L. A.; Smith, D. G. A.; Simmonett, A. C.; DePrince, A. E., 3rd; Hohenstein, E. G.; Bozkaya, U.; Sokolov, A. Y.; Di Remigio, R.; Richard, R. M.; Gonthier, J. F.; James, A. M.; McAlexander, H. R.; Kumar, A.; Saitow, M.; Wang, X.; Pritchard, B. P.; Verma, P.; Schaefer, H. F., 3rd; Patkowski, K.; King, R. A.; Valeev, E. F.; Evangelista, F. A.; Turney, J. M.; Crawford, T. D.; Sherrill, C. D. Psi4 1.1: An Open-Source Electronic Structure Program Emphasizing Automation, Advanced Libraries, and Interoperability. *J. Chem. Theory Comput.* **2017**, *13* (7), 3185-3197.
- (13) Udomvech, A.; Kerdcharoen, T.; Osotchan, T. First principles study of Li and Li<sup>+</sup> adsorbed on carbon nanotube: Variation of tubule diameter and length. *Chem. Phys. Lett.* **2005**, *406* (1-3), 161-166.
- (14) Gao, S.; Shi, G.; Fang, H. Impact of cation-pi interactions on the cell voltage of carbon nanotube-based Li batteries. *Nanoscale* **2016**, *8* (3), 1451-1455.
- (15) Shanmugam, S.; Nachimuthu, S.; Subramaniam, V. The effect of edge termination on Li<sup>+</sup> ion adsorption of pristine and defected graphene sheets. *J. Mater. Sci.* **2020**, *55* (14), 5920-5937.
- (16) Sangavi, S.; Santhanamoorthi, N.; Vijayakumar, S. Density functional theory study on the adsorption of alkali metal ions with pristine and defected graphene sheet. *Mol. Phys.* **2018**, *117* (4), 462-473.
- (17) Zheng, J.; Ren, Z.; Guo, P.; Fang, L.; Fan, J. Diffusion of Li<sup>+</sup> ion on graphene: A DFT study. *Appl. Surf. Sci.* **2011**, *258* (5), 1651-1655.
- (18) Kheirabadi, N.; Shafiekhani, A. Graphene/Li-ion battery. *J. Appl. Phys.* **2012**, *112* (12).
- (19) Olsson, E.; Chai, G.; Dove, M.; Cai, Q. Adsorption and migration of alkali metals (Li, Na, and K) on

- pristine and defective graphene surfaces. *Nanoscale* **2019**, *11* (12), 5274-5284.
- (20) Wu, D. H.; Li, Y. F.; Zhou, Z. First-principles studies on doped graphene as anode materials in lithium-ion batteries. *Theor. Chem. Acc.* **2011**, *130* (2-3), 209-213.
- (21) Nakada, K.; Ishii, A. Migration of adatom adsorption on graphene using DFT calculation. *Solid State Commun.* **2011**, *151* (1), 13-16.
- (22) Lu, T. Simple, reliable, and universal metrics of molecular planarity. *J. Mol. Model.* **2021**, *27* (9).
- (23) Yao, L.-H.; Cao, W.-Q.; Cao, M.-S. Doping effect on the adsorption of Na atom onto graphenes. *Curr. Appl Phys.* **2016**, *16* (5), 574-580.
